# Supplementary material for: Transposon silencing in the Drosophila female germline is essential for genome stability in progeny embryos
Source: Life Sci Alliance. 2018 Sep 17;1(5):e201800179. doi: 10.26508/lsa.201800179 (PMC6238532; doi:10.26508/lsa.201800179)
Supplement: Supplementary file 5 [file LSA-2018-00179_TableS5.docx]

Supplementary Table S5 (related to supplementary Fig S4): Egg-laying and hatching rates (3 replicates).

| Genotypes/Crosses | Average # of eggs laid per female | Average # of hatched larvae |
| --- | --- | --- |
| *w1118* | 54 | 53 |
| *vasD1, mnkP6/*  *vasD1, mnkP6* | 20 | 0 |
| *mnkP6/ mnkP6* | 51 | 31 |
| *agot2/ agot3* | 5 | 0 |
|  | | |
| *w1118* | 51 | 50 |
| *vasD1, mnkP6/*  *vasD1, mnkP6* | 28 | 0 |
| *mnkP6/ mnkP6* | 50 | 24 |
| *agot2/ agot3* | 3 | 0 |
|  | | |
| *w1118* | 51 | 51 |
| *vasD1, mnkP6/*  *vasD1, mnkP6* | 22 | 0 |
| *mnkP6/ mnkP6* | 45 | 19 |
| *agot2/ agot3* | 5 | 0 |
